# Supplementary material for: Cobalt metal–organic framework-based ZIF-67 for the trace determination of herbicide molinate by ion mobility spectrometry: investigation of different morphologies
Source: PubMed Central journal article supplement (PMC8693792; doi:10.1039/d0ra09298c), 2021-01-12
Supplement: RA-011-D0RA09298C-s001.pdf [file RA-011-D0RA09298C-s001.pdf]

## **Supporting Information**

### **Cobalt metal-organic framework based ZIF-67 for trace determination of herbicide molinate by Ion mobility spectrometry: Investigation of different morphologies**

*Mehdi Davoodi<sup>a</sup>, Fatemeh Davar<sup>a,\*</sup>, Mohammad R. Rezayat<sup>a</sup>, Mohammad T. Jafari<sup>a</sup> and*

*Ahmed Esmail Shalan<sup>b, c,\*</sup>*

<sup>a</sup>Department of Chemistry, Isfahan University of Technology, Isfahan, 84156-83111, Iran

<sup>b</sup> BCMaterials, Basque Center for Materials, Applications and Nanostructures, Martina Casiano, UPV/EHU Science Park, Barrio Sarriena s/n, Leioa 48940, Spain.

<sup>c</sup> Central Metallurgical Research and Development Institute (CMRDI), P.O. Box 87, Helwan, Cairo 11421, Egypt.

*\*Corresponding authors. E-mail addresses: [davar@cc.iut.ac.ir](mailto:davar@cc.iut.ac.ir) (F. Davar), [a.shalan133@gmail.com](mailto:a.shalan133@gmail.com); [ahmed.shalan@bcmaterials.net](mailto:ahmed.shalan@bcmaterials.net) (A. E. Shalan).*

**Table S1:** The instrumental conditions of the CD-IMS

| <b>Parameter</b>                             | <b>Setting</b>            |
|----------------------------------------------|---------------------------|
| IMS mode                                     | Positive                  |
| IMS type                                     | Drift tube                |
| Ionization source                            | Corona discharge          |
| IMS detector                                 | Faraday cup               |
| Needle voltage                               | 2.0 kV                    |
| Target electrode voltage                     | 7.0 kV                    |
| Drift electric field                         | 400 V cm <sup>-1</sup>    |
| Drift gas flow (N <sub>2</sub> , 99.999 %)   | 1000 mL min <sup>-1</sup> |
| Carrier gas flow (N <sub>2</sub> , 99.999 %) | 800 mL min <sup>-1</sup>  |
| IMS cell temperature                         | 150 °C                    |
| Injection port temperature                   | 220 °C                    |
| Drift tube length                            | 11 cm                     |
| Shutter grid pulse                           | 180 μs                    |
| Shutter grid voltage                         | 200 V                     |
| Shutter grid frequency                       | 25 Hz                     |
| Number of IMS averages                       | 25                        |
| Number of points per ion mobility spectrum   | 500                       |

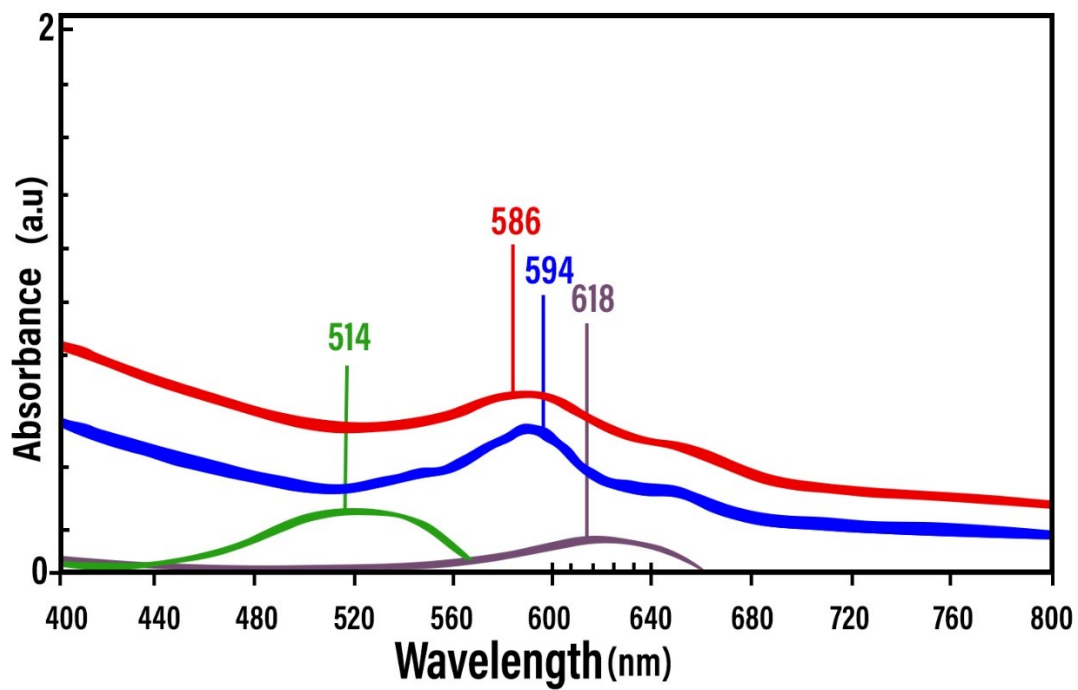

**Figure S1:** UV-Visible spectra of Co-MOFs based ZIF-67 prepared with different solvents, (a) methanol [594 nm], (b) ethanol [586 nm], (c) water [618 nm], (d) methanol-water [514 nm].

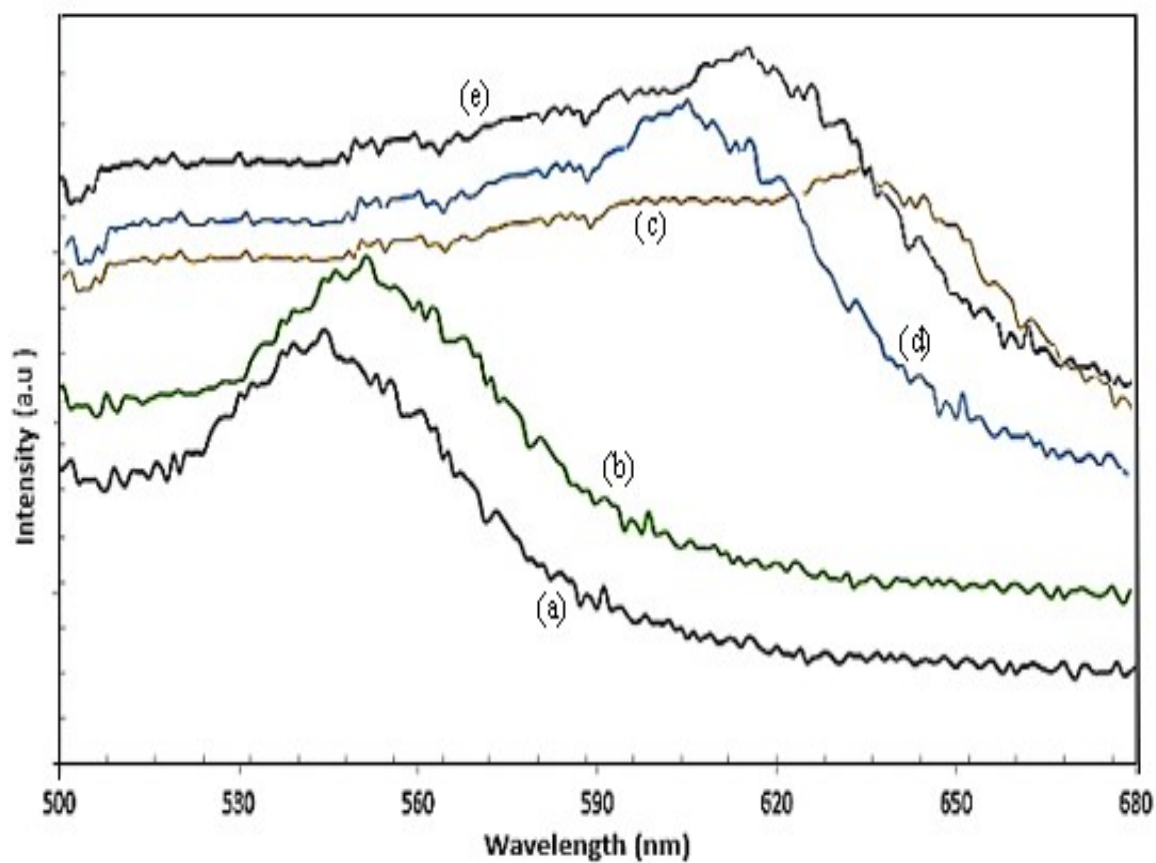

**Figure S2:** PL spectra of Co-MOFs based ZIF-67 Prepared with different solvents, (a) methanol-water (b) ethanol-water (c) water (d) methanol (e) ethanol.

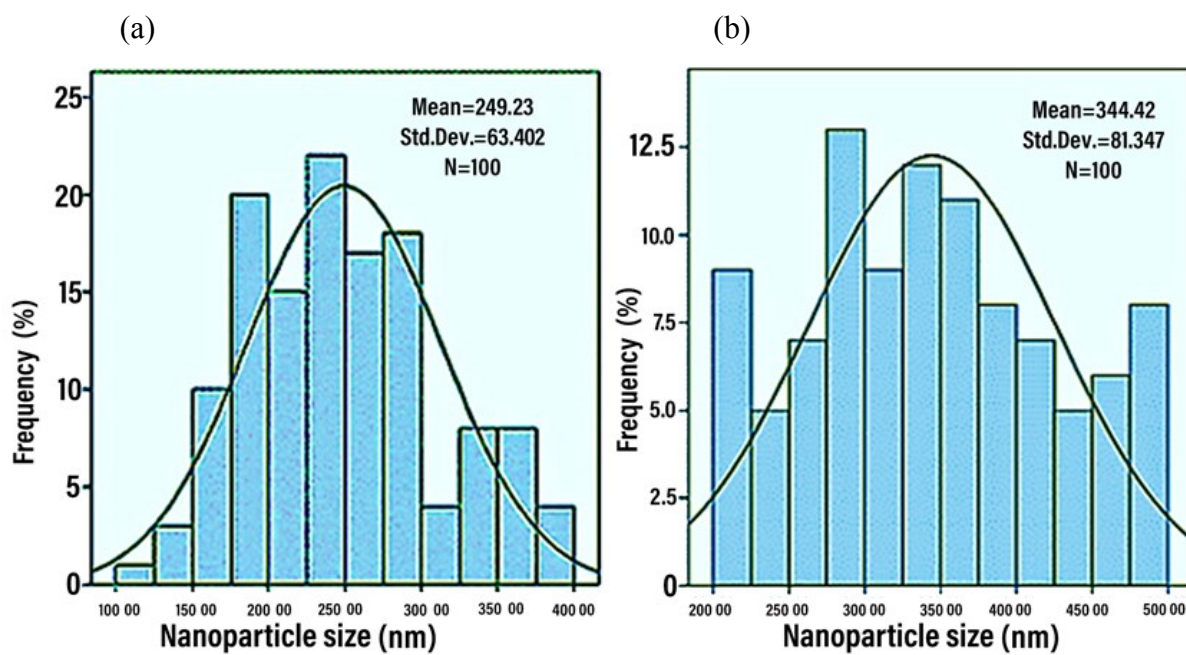

**Figure S3:** Particle size distribution of Co-MOFs based ZIF-67 obtained with different solvents (a) ethanol (b) methanol.

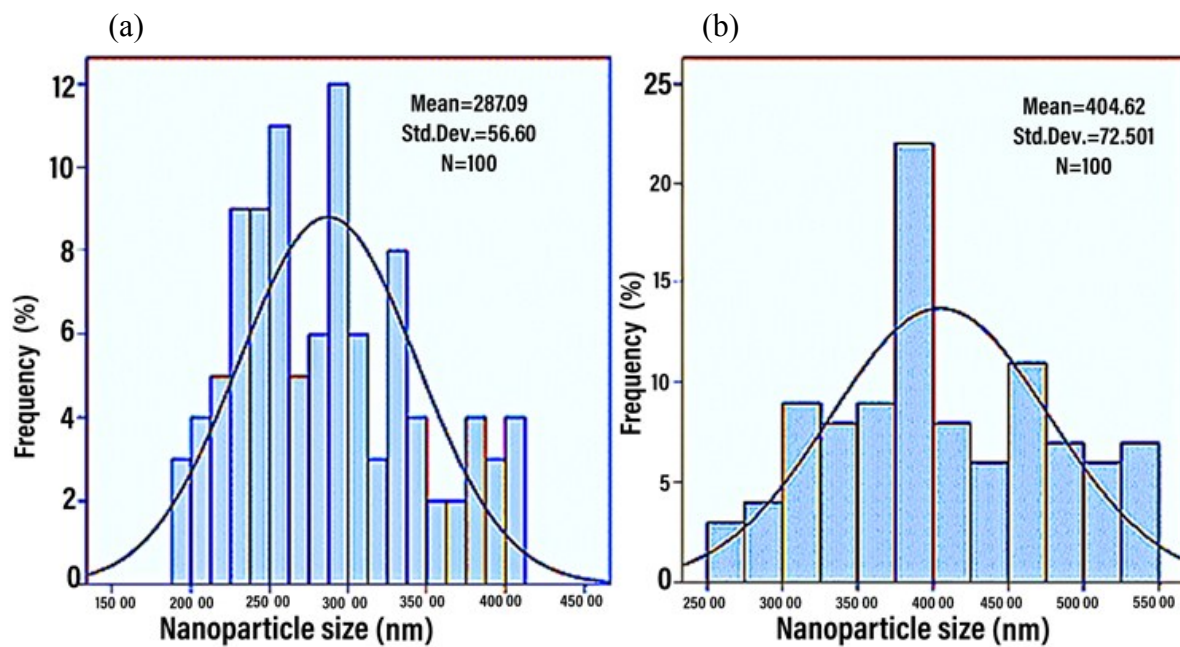

**Figure S4:** Particle size distribution of Co-MOFs based ZIF-67 obtained with different cobalt sources

(a)  $CoCl_2$  (b)  $CoSO_4$

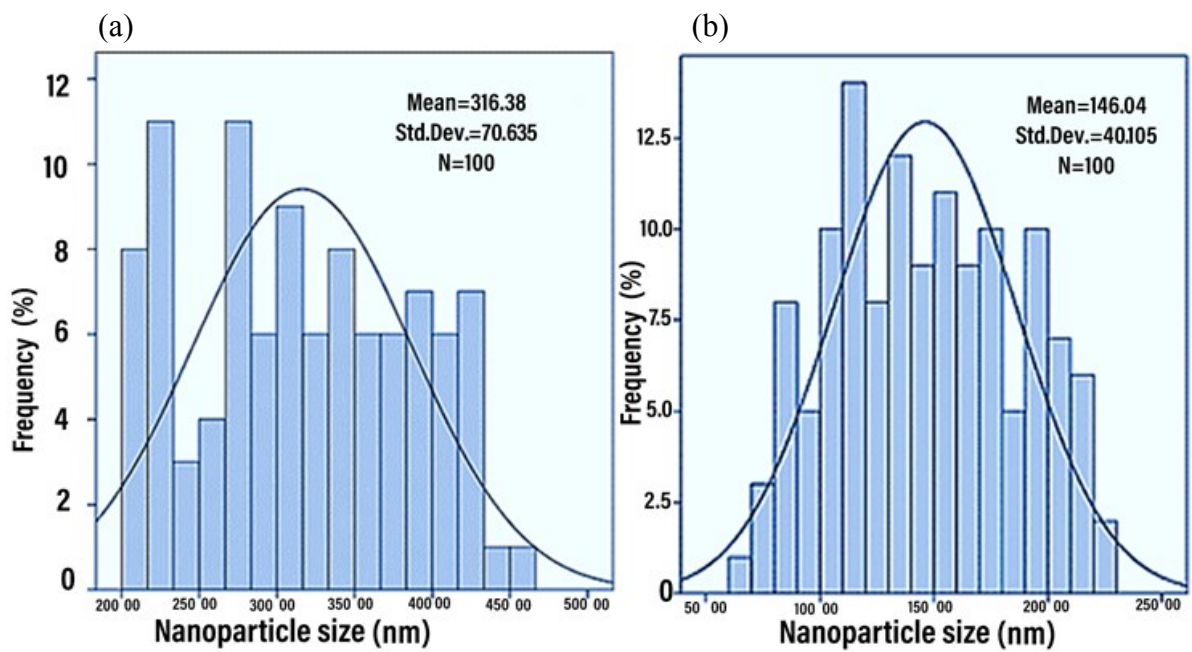

**Figure S5:** Particle size distribution of Co-MOFs based ZIF-67 obtained at (a) non-temperature (25°C) (b) under temperature (100°C).

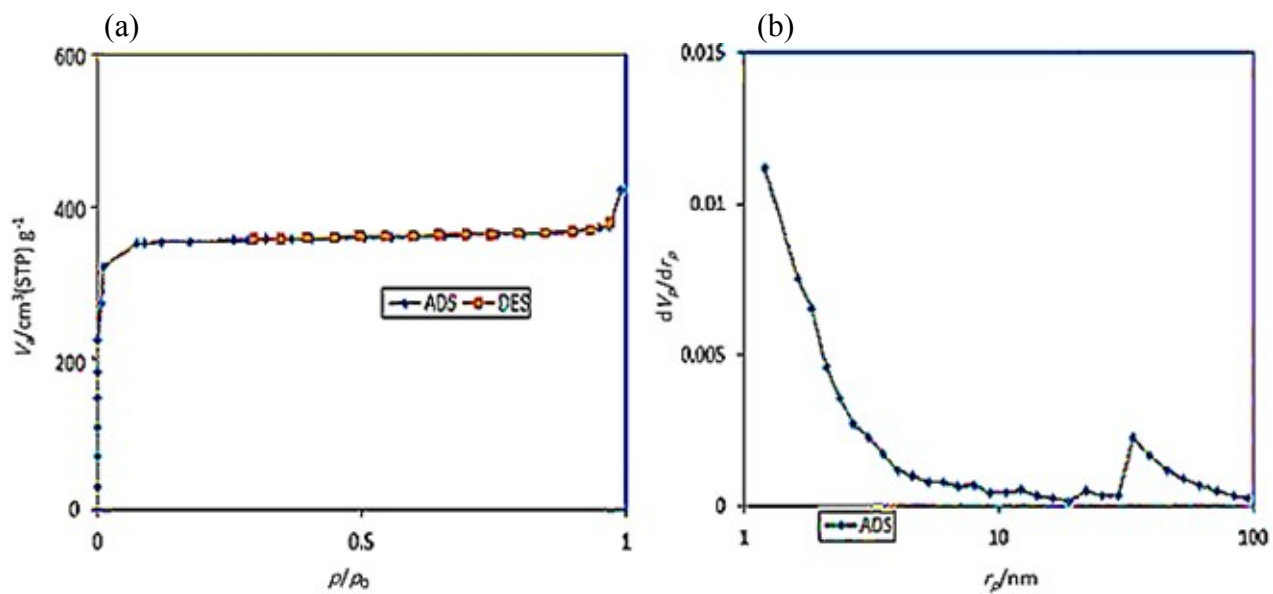

**Figure S6:** (a) Adsorption/desorption isotherms of  $N_2$  and (b) pore size distribution of Co-MOFs based ZIF-67 indicate for  $SO_1$  sample



**Table S2:** Surface area and porosity of Co-MOFs based ZIF-67 ( $SO_1$ )sample.

| Sample        | BET Surface area | pore volume | Mean pore diameter |
|---------------|------------------|-------------|--------------------|
|               | $m^2/g$          | $cm^3/g$    | (nm)               |
| Co-MOFs based | 1528             | 0.083       | 1.21               |
| ZIF-67        |                  |             |                    |
